# Supplementary material for: Aqueous Na-ion capacitor with CuS graphene composite in symmetric and asymmetric configurations
Source: Royal Society of Chemistry journal article supplement (doi:10.1039/d1nj03183j), 2021-01-01
Supplement: d1nj03183j1.pdf [file d1nj03183j1.pdf]

## **Electronic supplementary information (ESI)**

### **Aqueous Na-ion capacitor with CuS graphene composite in symmetric and asymmetric configurations**

*Manoj Goswami,<sup>a, b</sup> Mattath Athika,<sup>c</sup> Satendra Kumar,<sup>a, b</sup> Netrapal Singh,<sup>a,b</sup> N. Sathish,<sup>a,b</sup> Perumal Elumalai,<sup>c\*</sup> and Surender Kumar<sup>a, b\*</sup>*

<sup>a</sup> *Academy of Scientific and Innovative Research (AcSIR), Ghaziabad-201002, India.*

<sup>b</sup> *CSIR - Advanced Materials and Processes Research Institute (AMPRI), Bhopal - 462026, India.*

<sup>c</sup> *Centre for Green Energy Technology, Pondicherry University, Puducherry - 605014., India.*

\*Corresponding authors:

Prof. P. Elumalai, Email: [drperumalelumalai@gmail.com](mailto:drperumalelumalai@gmail.com)

Dr. Surender Kumar, Email: [surenderjanagal@gmail.com](mailto:surenderjanagal@gmail.com), [surender@ampri.res.in](mailto:surender@ampri.res.in)

### **Instrumentations**

Powder X-ray diffraction (PXRD) of as-prepared sample (CuS) was performed on Rigaku Miniflex II.; Cu K $\alpha$  radiation  $\lambda=1.5418 \text{ \AA}$  at a scan rate of  $0.02^\circ \text{ s}^{-1}$ . Functional group analysis was performed by FT-IR (Thermoscientific Nicolet IS50 FT-IR spectrophotometer). The morphology, surface study and mapping of the sample was characterized by field emission scanning electron microscopy (FE-SEM, Nova Nano SEM 430) equipped with an energy-dispersive X-ray spectrometer (EDAX) and transmission electron microscopy (TEM, JEM F-200). BET surface measurement was performed by St 2 on NOVA touch 2LX. X-ray photoelectron spectroscopic (XPS) analysis (AXIS-ULTRA DLD) and Raman spectroscopic (STR 500) analysis were used to know the chemical composition of CuS and CuS-G sample.

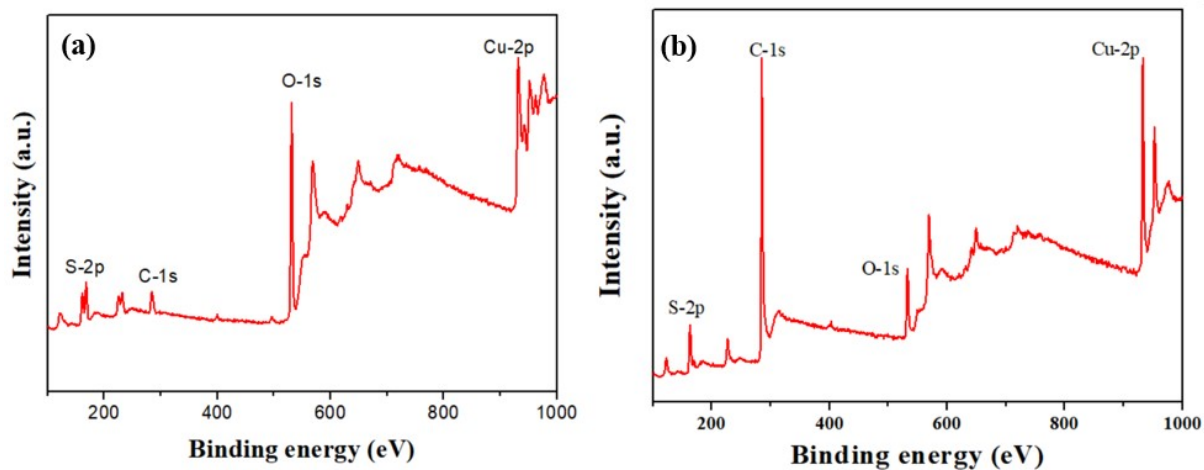

Figure S1 Wide XPS survey of CuS (a) and CuS-G (b) sample.

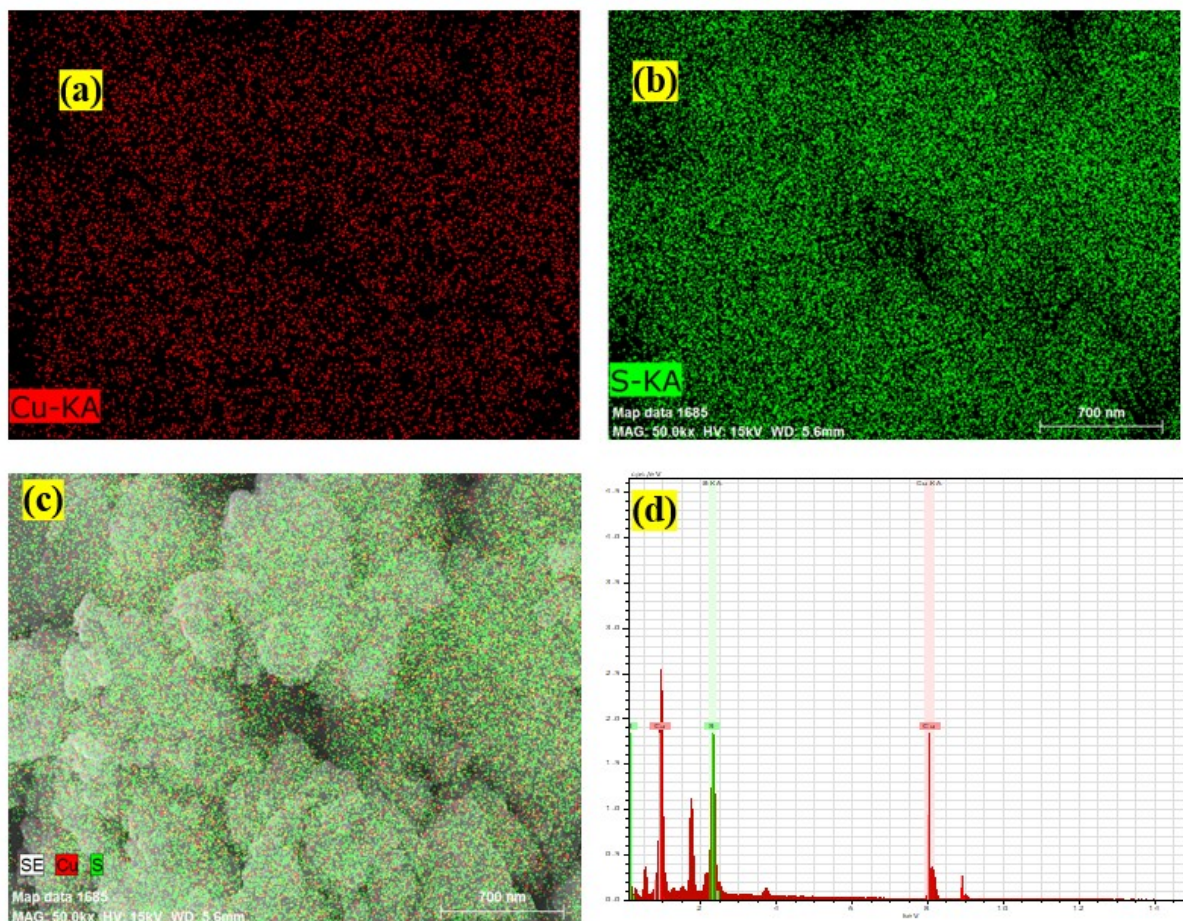

Figure S2 Mapping was performed to ensure the presence of copper (a), sulphur (b), CuS (c) with the EDAX (d) of CuS sample.

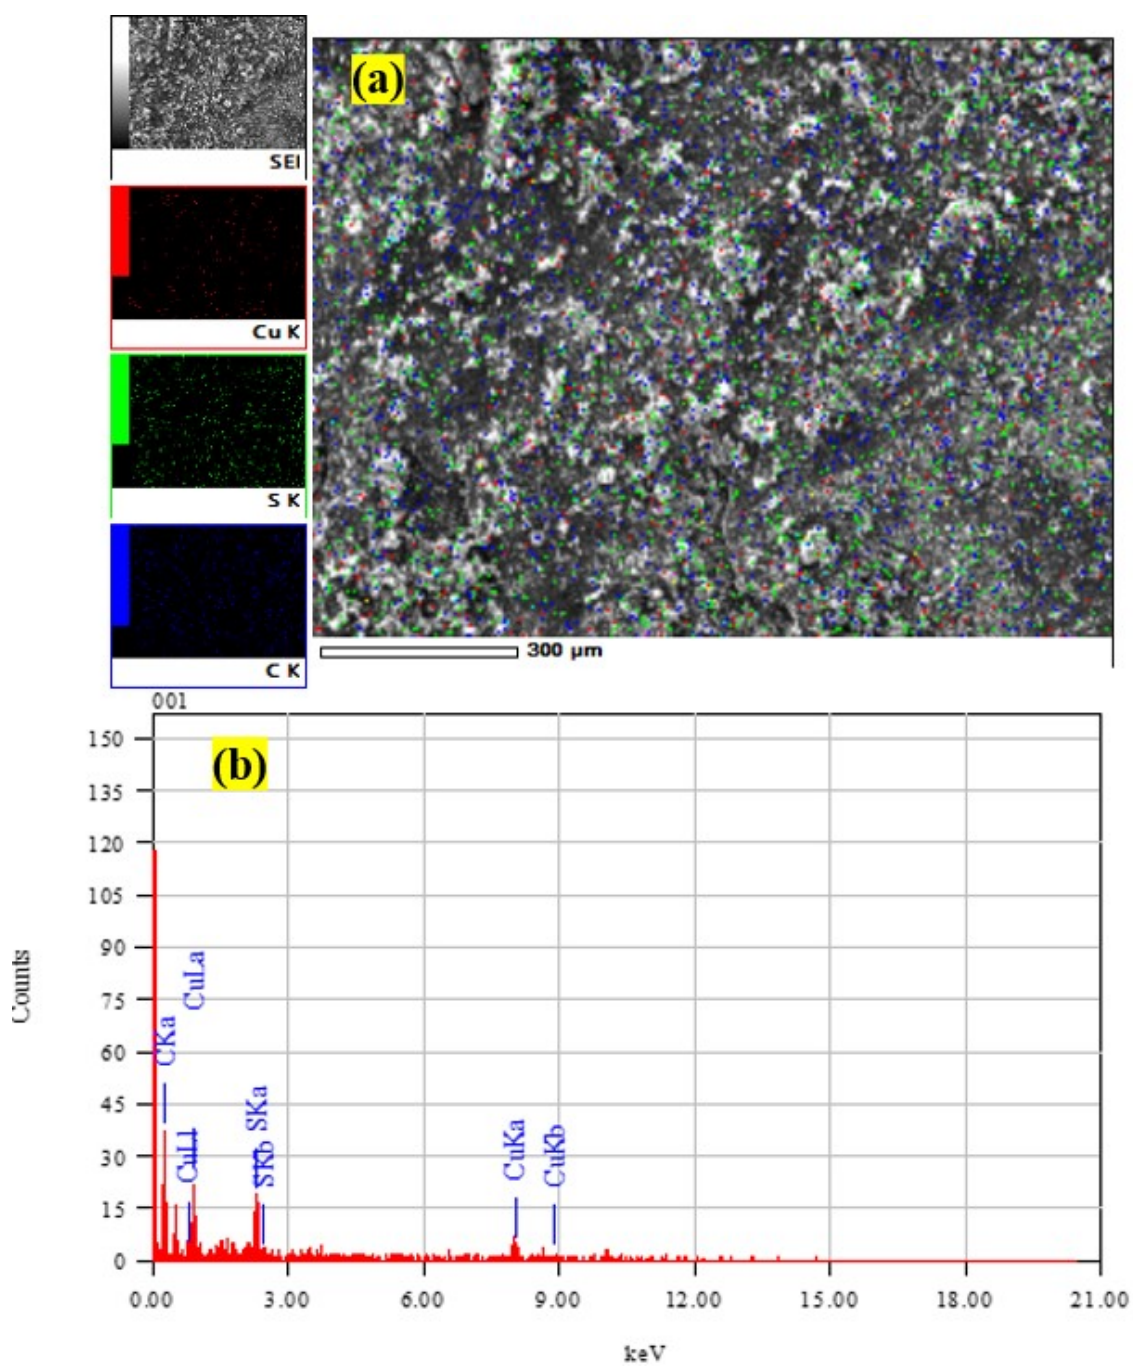

**Figure S3** Mapping was performed to ensure the presence copper, sulphur, graphene (a) along with EDAX (b) of CuS-G sample.

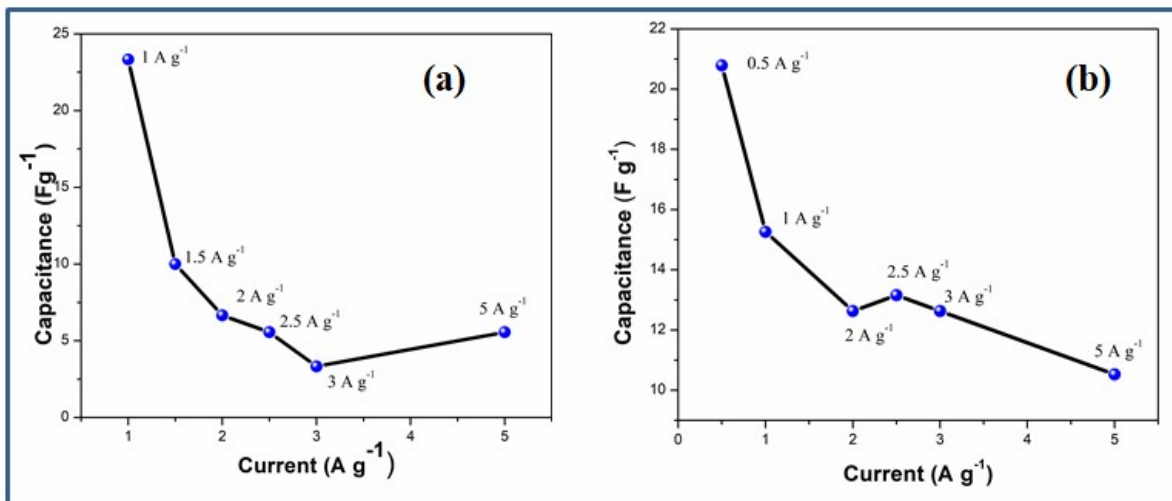

**Figure S4** dependence of specific capacitance on the different current densities for CuS (a) and CuS-G (b) electrode.

$$i = a \cdot v^b \tag{S1}$$

$$\log(i) = b \cdot \log(v) + \log(a) \tag{S2}$$

Where, 'i' is the current (mA), 'a' and 'b' are adjustable parameters and v is the scan rate (mV s<sup>-1</sup>)

### Electrochemically active surface area measurement

Electrochemically active surface area (ECSA) of the samples are calculated by double-layer capacitance method by using CV curves. The cyclic voltammograms presented in Figure S5 were collected in the non-faradaic region (for symmetric device) under the potential range of 1.0 to 1.3 V Vs. Ag/AgCl (figure S5a). Where the current is supposed to be due to only double-layer charging. The corresponding plot of current density at a fixed potential of 1.18 V versus the scan rates gives a straight line, the slope of which gives the value of Cdl (Figure S5b). The ECSA is calculated by dividing the Cdl by specific capacitance (Cs).

$$ECSA = Cdl/Cs \tag{S3}$$

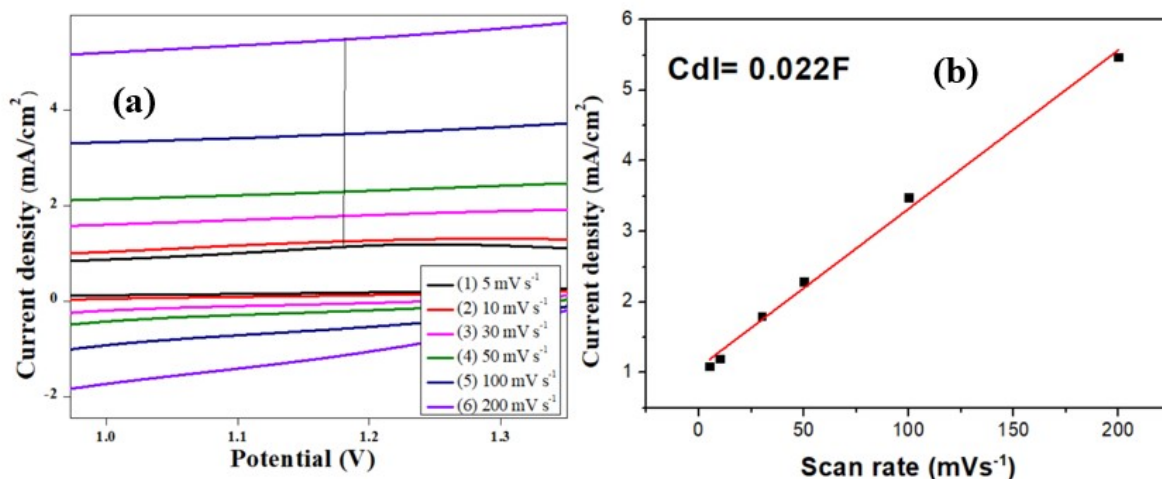

**Figure S5** Double layer capacitance measurement to calculate electrochemically active surface area of symmetric device. (A) Representation of cyclic voltammograms in a non-faradaic region. (b) Current measurement at fixed potential of 1.18 V plotted Vs. scan rate.

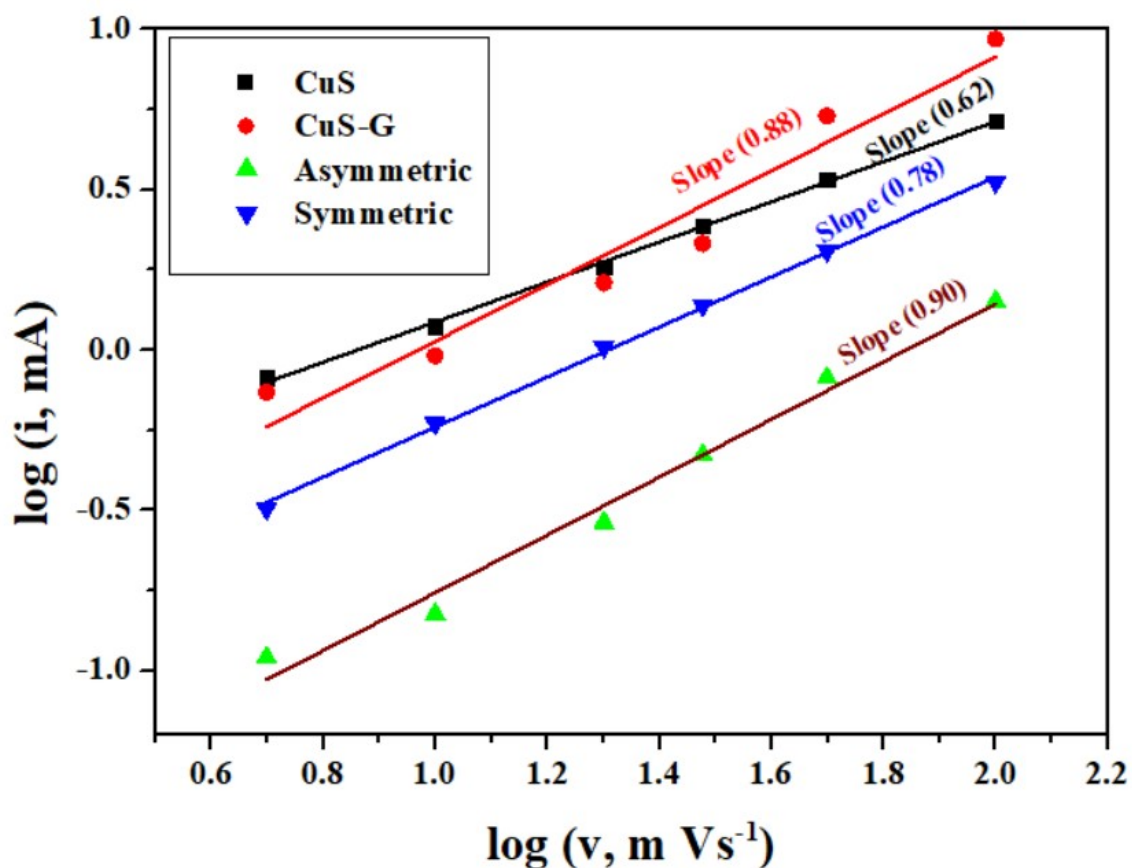

**Figure S6**  $\log(i)$  vs.  $\log(v)$  plots for CuS, CuS-G, asymmetric device and symmetric device.

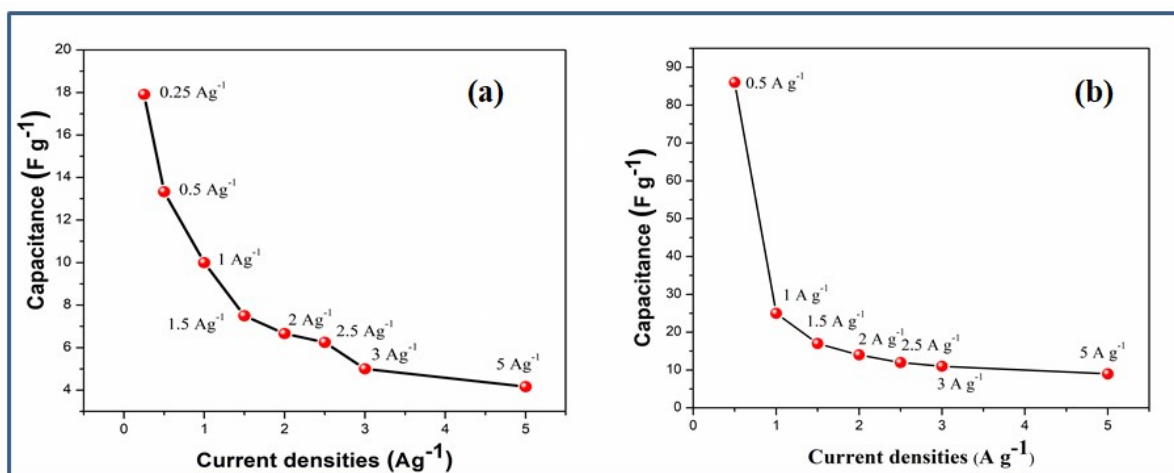

**Figure S7** Dependence of specific capacitance on the different current densities for asymmetric (a), symmetric (b) device.
